# Supplementary material for: Reducing Dementia Grief Through Psychosocial Interventions
Source: Atypon-hosted journal article supplement (doi:10.1027/1016-9040/a000501), 2023-03-01
Supplement: 1016-9040_a000501_esm1.pdf [file 1016-9040_a000501_esm1.pdf]

# Reducing Dementia Grief Through Psychosocial Interventions: A Systematic Review

<https://doi.org/10.1027/1016-9040/a000501>

**Table E1.** Summarized information of the included intervention studies

| Study, Country                        | Study design                                                                               | Sample:<br>Size and characteristics<br>IG/CG                                                                                                                               | Recruitment strategies                                                                                                                                      | Exclusion/<br>Inclusion                                                        | Format:<br>Duration /<br>number of sessions                         | Dementia grief assessment                                    | Outcome                                                                                                                                                                                                        | Contents                                                                                                                       | Intervention delivered by  | Level of evidence |
|---------------------------------------|--------------------------------------------------------------------------------------------|----------------------------------------------------------------------------------------------------------------------------------------------------------------------------|-------------------------------------------------------------------------------------------------------------------------------------------------------------|--------------------------------------------------------------------------------|---------------------------------------------------------------------|--------------------------------------------------------------|----------------------------------------------------------------------------------------------------------------------------------------------------------------------------------------------------------------|--------------------------------------------------------------------------------------------------------------------------------|----------------------------|-------------------|
| 1. Bravo-Benitez et al. (2021), Spain | QUANTITATIVE<br>Quasi-experimental randomized controlled design                            | <i>N</i> = 52 total<br><i>n</i> = 27 IG<br><i>n</i> = 25 CG<br>57.69% spouses<br>34.62% adult children<br><br>Mean age: 63.88<br>( <i>SD</i> = 17.55)<br><br>78.85% female | Presentations in center for family caregivers                                                                                                               | Psychotherapeutic or psychiatric treatment (exclusion)                         | On-site delivery, group program<br><br>10 sessions, each 90 minutes | CGS<br><br>Two assessment times (pre-and post-intervention)  | Interaction effect (time x group)<br><br>CGS scale Emotional Pain decrease for IG and increase for CG ( <i>p</i> = .011)<br><br>CGS scale Absolute Loss decrease for IG and increase for CG ( <i>p</i> = .029) | Imaginal exposure and in vivo exposure, cognitive restructuring, behavioral rehearsals, social skills training                 | 1 dementia care researcher | 3                 |
| 2. Duggleby et al. (2018), Canada     | QUANTITATIVE & QUALITATIVE<br>Mixed-methods single-arm repeated measures feasibility study | <i>N</i> = 37 total<br>30% spouses<br>59 % adult children<br><br>Mean age: 63.24 years ( <i>SD</i> = 11.68)<br><br>65% female<br><br>No CG                                 | Newspaper advertisements, local print media, local Alzheimer's Society e-newsletter, flyers at local support groups or events, recruited from other studies | No exclusion based on psychopathologies or ongoing psychotherapeutic treatment | 2 months use of self-administered web-based interactive site        | NDRGEI<br><br>Three assessment times (baseline, 1, 2 months) | Decreased dementia grief ( <i>p</i> = .006)                                                                                                                                                                    | Self-care strategies, end of life decision making, transitions to expect, quotes from other carers about experience, resources | Self-use                   | 4                 |

# Reducing Dementia Grief Through Psychosocial Interventions: A Systematic Review

<https://doi.org/10.1027/1016-9040/a000501>

| Study, Country               | Study design                                                              | Sample:<br>Size and characteristics<br>IG/CG                                                                                                                                                                                                                                                                                           | Recruitment strategies                                                                                                                          | Exclusion/<br>Inclusion                                                              | Format:<br>Duration /<br>number of sessions                                                                                                                                                                                                          | Dementia grief assessment                                          | Outcome                                                                                                                                                                                                                                                                                                                               | Contents                                                                                                                                                                                                                                 | Intervention delivered by                                      | Level of evidence |
|------------------------------|---------------------------------------------------------------------------|----------------------------------------------------------------------------------------------------------------------------------------------------------------------------------------------------------------------------------------------------------------------------------------------------------------------------------------|-------------------------------------------------------------------------------------------------------------------------------------------------|--------------------------------------------------------------------------------------|------------------------------------------------------------------------------------------------------------------------------------------------------------------------------------------------------------------------------------------------------|--------------------------------------------------------------------|---------------------------------------------------------------------------------------------------------------------------------------------------------------------------------------------------------------------------------------------------------------------------------------------------------------------------------------|------------------------------------------------------------------------------------------------------------------------------------------------------------------------------------------------------------------------------------------|----------------------------------------------------------------|-------------------|
| 3. Hicken et al. (2017), USA | QUANTITATIVE<br>Multisite intervention with stratified randomized cohorts | <i>N</i> = 229<br>4 IG<br>Users without internet:<br><i>n</i> = 30 (telehealth)<br><i>n</i> = 44 (phone uses)<br>Users with internet:<br><i>n</i> = 77 (internet)<br><i>n</i> = 78 (phone uses)<br>74% spouses of veterans<br>53 % rural living<br>45 % urban living<br>Mean age: 70.16<br>( <i>SD</i> = 11.22)<br>90% female<br>No CG | Advertisements at Veterans Administrations (VA) provider work rooms and VA hospital waiting room area, referrals from health care practitioners | Care recipient diagnosed with severe mental illness before the age of 45 (exclusion) | 4- to 6-month multicomponent program<br><br>Electronic IGs (telehealth and internet): 3 days per week for approximately 10-15 minutes<br><br>Phone IGs: printed material and DVD usable at any time and at least 1 additional monthly telephone call | MM-CGL-SF<br><br>Two assessment times (baseline, study completion) | Users without internet:<br>Phone group participants grief increase, telehealth group participants decrease of grief (total score, <i>p</i> = .017) and Worry and Felt Isolation subscale score ( <i>p</i> = .006)<br><br>Users with internet:<br>No significant change in grief<br><br>Comparable results when stratified by rurality | Information about dementia progression, caregiving skills, health topics communicating with medical providers, information about common legal issues, mood management and self-care strategies, cognitive and behavioral-based technique | Care manager (licensed clinical social worker or psychologist) | 3                 |

# Reducing Dementia Grief Through Psychosocial Interventions: A Systematic Review

<https://doi.org/10.1027/1016-9040/a000501>

| Study, Country             | Study design                                                     | Sample:<br>Size and characteristics<br>IG/CG                                                                                                                                                                                                                                                                                                      | Recruitment strategies                                                                  | Exclusion/<br>Inclusion                              | Format:<br>Duration / number of sessions | Dementia grief assessment                                   | Outcome                                                                                                                                                                                                                                                                                                                                                                                                                                                                                                     | Contents                                                                                                        | Intervention delivered by | Level of evidence |
|----------------------------|------------------------------------------------------------------|---------------------------------------------------------------------------------------------------------------------------------------------------------------------------------------------------------------------------------------------------------------------------------------------------------------------------------------------------|-----------------------------------------------------------------------------------------|------------------------------------------------------|------------------------------------------|-------------------------------------------------------------|-------------------------------------------------------------------------------------------------------------------------------------------------------------------------------------------------------------------------------------------------------------------------------------------------------------------------------------------------------------------------------------------------------------------------------------------------------------------------------------------------------------|-----------------------------------------------------------------------------------------------------------------|---------------------------|-------------------|
| 4. Jain et al. (2019), USA | QUANTITATIVE<br><br>Add-on to controlled pilot feasibility study | <i>N</i> = 23 at baseline (assessment for dementia grief, mindfulness, and depression)<br><i>n</i> = 17 at baseline (fMRI)<br><i>n</i> = 9 at follow-up (fMRI and assessment for dementia grief, mindfulness, and depression)<br><br>30% spouses<br>70% adult children<br><br>Mean age: 60.00 ( <i>SD</i> = 11.00)<br><br>91% female<br><br>No CG | Flyers, study pamphlets at local support groups or events, recruited from other studies | Acute severe mental illness in caregiver (exclusion) | 4-weeks MIT or PMR                       | MM-CGL-SF<br><br>Two assessment times (baseline, follow-up) | Baseline:<br>Negative correlation between mindfulness and dementia grief ( $r = -.70, p < .001$ );<br>Caregiver grief-related stimuli elicited brain activity in regions identified with bereavement grief<br><br>Follow-up:<br>Decrease in grief scores from baseline ( $M = 61.7, SD = 13.8$ ) to follow-up ( $M = 55.1, SD = 15.2$ ), $d = 0.92$ ;<br>Improvement in grief predicted by increased relative brain activation in the precuneus and anterior cingulate (different subregions from baseline) | MIT: weekly group meetings and take-home exercises<br><br>PMR: provision of a compact disk with a PMR recording | Not stated                | 4                 |

# Reducing Dementia Grief Through Psychosocial Interventions: A Systematic Review

<https://doi.org/10.1027/1016-9040/a000501>

| Study, Country                       | Study design                                                 | Sample:<br>Size and characteristics<br>IG/CG                                                                                   | Recruitment strategies                                                                                                                         | Exclusion/<br>Inclusion                                                                         | Format:<br>Duration /<br>number of sessions                                                                                                                                          | Dementia grief assessment | Outcome                                                                                                                                                                                                                                                                                                | Contents                                                                                                                                                                 | Intervention delivered by                          | Level of evidence                                             |
|--------------------------------------|--------------------------------------------------------------|--------------------------------------------------------------------------------------------------------------------------------|------------------------------------------------------------------------------------------------------------------------------------------------|-------------------------------------------------------------------------------------------------|--------------------------------------------------------------------------------------------------------------------------------------------------------------------------------------|---------------------------|--------------------------------------------------------------------------------------------------------------------------------------------------------------------------------------------------------------------------------------------------------------------------------------------------------|--------------------------------------------------------------------------------------------------------------------------------------------------------------------------|----------------------------------------------------|---------------------------------------------------------------|
| 5. MacCourt et al. (2017), Canada    | QUANTITATIVE<br>Controlled study using a mixed method design | <i>N</i> = 200<br><i>n</i> = 123 IG<br><i>n</i> = 77 CG<br>61.9% spouses<br>23% adult children<br>Mean age: 64.4<br>79% female | Newspaper advertisements, local print media, referrals from local Alzheimer's Society                                                          | No exclusion based on psychopathologies or ongoing psychotherapeutic treatment                  | Five methods of delivery in IG: individual face-to-face, individual by telephone, face-to-face group, telephone group, and online group<br><br>Six possible sessions, two follow-ups | MM-CGI                    | Less grief in IG compared to CG ( $p = .003$ )<br><br>Dementia grief t1 ( $p < .001$ ) and no university education ( $p = .047$ ) predicted a decrease in dementia grief at t2<br><br>Dementia grief in spouses decreased in IG but was still higher than for adult caregiving children ( $p = .006$ ) | Introduction to transitions, dimensions of grief, living with grief, honoring grief, maintaining self, and enhancing resilience                                          | Registered clinical counselors                     | 3<br><br>IG or CG not randomized based on time of recruitment |
| 6. Meichsner et al. (2016a), Germany | QUALITATIVE<br>Qualitative study within RCT                  | <i>N</i> = 33<br>90.9% female                                                                                                  | Newspaper advertisements, local print media, radio, internet, television, referrals from cooperating institutions or health care practitioners | Psychotherapeutic treatment or acute severe mental or physical illness in caregiver (exclusion) | Sequences from 61 therapy sessions                                                                                                                                                   | -                         | Acceptance of loss and change, overcoming avoidance of associated painful emotions via CBT and ACT                                                                                                                                                                                                     | Grief intervention strategies were recognition and acceptance of loss and change, addressing future losses, normalization of grief, and redefinition of the relationship | Trained clinical psychologists or psychotherapists | 5                                                             |

# Reducing Dementia Grief Through Psychosocial Interventions: A Systematic Review

<https://doi.org/10.1027/1016-9040/a000501>

| Study, Country                      | Study design     | Sample: Size and characteristics<br>IG/CG                                                                                | Recruitment strategies                  | Exclusion/Inclusion                                                                             | Format: Duration / number of sessions                                                                                                          | Dementia grief assessment                                                                                       | Outcome                                                                                                                                                                                                                                                                                                                                                                                                                                                                                                                                                                    | Contents                                                                                                                                                               | Intervention delivered by                          | Level of evidence |
|-------------------------------------|------------------|--------------------------------------------------------------------------------------------------------------------------|-----------------------------------------|-------------------------------------------------------------------------------------------------|------------------------------------------------------------------------------------------------------------------------------------------------|-----------------------------------------------------------------------------------------------------------------|----------------------------------------------------------------------------------------------------------------------------------------------------------------------------------------------------------------------------------------------------------------------------------------------------------------------------------------------------------------------------------------------------------------------------------------------------------------------------------------------------------------------------------------------------------------------------|------------------------------------------------------------------------------------------------------------------------------------------------------------------------|----------------------------------------------------|-------------------|
| 7. Meichsner & Wilz (2018), Germany | QUANTITATIVE RCT | <i>N</i> = 273<br><i>n</i> = 139 IG<br><i>n</i> = 134 CG<br><br>Mean age: 64.20 ( <i>SD</i> = 11.04)<br><br>80.6% female | Referrals from cooperating institutions | Psychotherapeutic treatment or acute severe mental or physical illness in caregiver (exclusion) | Telephone based cognitive behavioral intervention with 12 individual therapy sessions for 6 months with one grief-specific intervention module | CGS<br><br>Three assessment times (baseline before randomization, post-intervention assessment, after 6 months) | Reduced burden due to pre-death grief for IG but not CG after 6 months (Cohen's <i>d</i> = -0.361)<br><br>Intervention effect after controlling for care situation and sociodemographic variables (Cohen's <i>d</i> = 0.248)<br><br>Lower dementia grief for caregivers with care recipient at home compared to care recipients at care facilities after intervention ( <i>p</i> = .008, Cohen's <i>d</i> = -0.324)<br><br>Significant correlation between dementia grief and relationship to care recipient ( <i>p</i> = .001, Cohen's <i>d</i> = -0.399), but not gender | 1 of 10 intervention modules especially addressing grief-related aspects e.g., emotion-based coping-strategies and acceptance of the disease and the resulting changes | Trained clinical psychologists or psychotherapists | 2                 |

# Reducing Dementia Grief Through Psychosocial Interventions: A Systematic Review

<https://doi.org/10.1027/1016-9040/a000501>

| Study, Country                       | Study design              | Sample:<br>Size and characteristics<br>IG/CG                                                                                                           | Recruitment strategies                                                                                                                                                      | Exclusion/<br>Inclusion                                                                         | Format:<br>Duration /<br>number of<br>sessions                                                                                                                                          | Dementia grief<br>assessment                                                                                               | Outcome                                                                                                                                                                                                                                                                                                                                                       | Contents                                                                                                                                                               | Intervention<br>delivered by                                                                            | Level of<br>evidence |
|--------------------------------------|---------------------------|--------------------------------------------------------------------------------------------------------------------------------------------------------|-----------------------------------------------------------------------------------------------------------------------------------------------------------------------------|-------------------------------------------------------------------------------------------------|-----------------------------------------------------------------------------------------------------------------------------------------------------------------------------------------|----------------------------------------------------------------------------------------------------------------------------|---------------------------------------------------------------------------------------------------------------------------------------------------------------------------------------------------------------------------------------------------------------------------------------------------------------------------------------------------------------|------------------------------------------------------------------------------------------------------------------------------------------------------------------------|---------------------------------------------------------------------------------------------------------|----------------------|
| 8. Meichsner et al. (2019a), Germany | QUALITATIVE<br>Case study | <i>N</i> = 2<br>64 y. spouse<br>53 y. adult child<br>100% female                                                                                       | Newspaper advertisements, local print media, radio, internet, television, presentations in groups or centers for family caregivers, referrals from cooperating institutions | Psychotherapeutic treatment or acute severe mental or physical illness in caregiver (exclusion) | Coding of 3 therapy sessions (each 50 min.) using qualitative Content Analysis                                                                                                          | -                                                                                                                          | Therapy intervention strategies addressing grief and losses, tolerating difficult feelings and adaptation in line with the dementia grief model proved to be helpful                                                                                                                                                                                          | 1 of 10 intervention modules especially addressing grief-related aspects e.g., emotion-based coping-strategies and acceptance of the disease and the resulting changes | Trained clinical psychologists or psychotherapists                                                      | 5                    |
| 9. Meichsner et al. (2019b), Germany | QUANTITATIVE<br>RCT       | <i>N</i> = 37<br><i>n</i> = 19 IG<br><i>n</i> = 18 WCG<br>73% spouses<br>27 % adult children<br>Mean age: 62.11<br>( <i>SD</i> = 9.67)<br>78.4% female | Newspaper advertisements, local print media, radio, internet, television, referrals from cooperating institutions or health care practitioners                              | Psychotherapeutic treatment or acute severe mental or physical illness in caregiver (exclusion) | Online CBT intervention for 8 weeks, adaptation of telephone-based CBT intervention with up to 10 individually applied therapy modules and exchange of 8 weekly messages with therapist | CGS<br>Three assessment times (baseline, postintervention at 8 weeks after baseline, follow-up at 5 months after baseline) | No group differences in coping with dementia grief at postintervention ( <i>p</i> = .125, Cohen's <i>d</i> = -0.171) or follow-up ( <i>p</i> = .844, Cohens's <i>d</i> = -0.025); Subscale Absolute Loss decrease at postintervention ( <i>p</i> = .049, Cohen's <i>d</i> = 0.315), but not at follow-up ( <i>p</i> = .914, Cohen's <i>d</i> = -0.085) for IG | 1 of 10 intervention modules especially addressing grief-related aspects e.g., emotion-based coping-strategies and acceptance of the disease and the resulting changes | Four female clinical psychologists with completed or nearly completed postgraduate CBT training program | 2                    |

# Reducing Dementia Grief Through Psychosocial Interventions: A Systematic Review

<https://doi.org/10.1027/1016-9040/a000501>

| Study, Country                 | Study design                             | Sample:<br>Size and characteristics<br>IG/CG                                                                                                                             | Recruitment strategies                               | Exclusion/<br>Inclusion                                                        | Format:<br>Duration /<br>number of sessions                                                               | Dementia grief assessment                                                                                                                      | Outcome                                                                                                                                                                                                                   | Contents                                                                          | Intervention delivered by | Level of evidence |
|--------------------------------|------------------------------------------|--------------------------------------------------------------------------------------------------------------------------------------------------------------------------|------------------------------------------------------|--------------------------------------------------------------------------------|-----------------------------------------------------------------------------------------------------------|------------------------------------------------------------------------------------------------------------------------------------------------|---------------------------------------------------------------------------------------------------------------------------------------------------------------------------------------------------------------------------|-----------------------------------------------------------------------------------|---------------------------|-------------------|
| 10. Paun & Cothran (2019), USA | QUANTITATIVE<br>Single-group pilot study | <i>N</i> = 5<br>20% spouses<br>60% adult children<br><br>45 to 65 years ( <i>n</i> = 2), 66 to 75 years ( <i>n</i> = 2); and >75 years ( <i>n</i> = 1)<br><br>75% female | Referrals from facility leadership in long term care | No exclusion based on psychopathologies or ongoing psychotherapeutic treatment | Video group-based intervention<br><br>Standardized intervention manual<br><br>8 weekly 60-minute sessions | Survey questions with scores ranged from 0 (not at all) to 4 (very much)<br><br>Two assessment time (baseline, postintervention after 8 weeks) | Agreement rate <i>M</i> = 3.6 ( <i>SD</i> = 0.55) to survey question about group's helpfulness on dealing with dementia grief<br><br>Using online video-based technology proved to be feasible with high acceptance rates | Knowledge, communication/ conflict resolution skills, and grief management skills | First author (O.P.)       | 4                 |

## Reducing Dementia Grief Through Psychosocial Interventions: A Systematic Review

<https://doi.org/10.1027/1016-9040/a000501>

| Study, Country                   | Study design                                                        | Sample:<br>Size and characteristics<br>IG/CG                                                                                    | Recruitment strategies                               | Exclusion/<br>Inclusion                                                                                                                                                                                | Format:<br>Duration / number of sessions                       | Dementia grief assessment                                                                            | Outcome                                                                                                                                                               | Contents                                                                                                                                                                                                                                                                      | Intervention delivered by | Level of evidence |
|----------------------------------|---------------------------------------------------------------------|---------------------------------------------------------------------------------------------------------------------------------|------------------------------------------------------|--------------------------------------------------------------------------------------------------------------------------------------------------------------------------------------------------------|----------------------------------------------------------------|------------------------------------------------------------------------------------------------------|-----------------------------------------------------------------------------------------------------------------------------------------------------------------------|-------------------------------------------------------------------------------------------------------------------------------------------------------------------------------------------------------------------------------------------------------------------------------|---------------------------|-------------------|
| 11. Scher et al. (2022), Britain | QUANTITATIVE and QUALITATIVE<br><br>Single group intervention study | <i>N</i> = 31<br><br>84% female<br><br>No CG                                                                                    | Recruited from other studies                         | No exclusion based on psychopathologies or ongoing psychotherapeutic treatment; priority for caregivers with higher grief scores (inclusion), high stress in prior grief-related interview (exclusion) | 1 time evaluation                                              | Survey questions covering usefulness, acceptability, and relevance of the animation<br><br>MM-CGI-SF | 94% found the animation very (68%) or somewhat (26%) relevant to their situation<br><br>Qualitative analysis: helpful for understanding grief, targeting newer carers | Animation raising awareness of dementia grief                                                                                                                                                                                                                                 | Developed by 11 experts   | 4                 |
| 12. Supiano et al. (2021), USA   | QUANTITATIVE<br><br>Pilot intervention study                        | <i>N</i> = 25<br><br>32% spouses<br>48% adult children<br><br>Mean age: 67.0 ( <i>SD</i> = 12.7)<br><br>88% female<br><br>No CG | Referrals from facility leadership in long term care | Positive scores on 4 of 9 mental health-related risk factors and minimum score of 4 on grief questionnaire as participation requirement (inclusion)                                                    | 10-session multi-modal group psychotherapy, 120-minute session | ICG-r<br><br>p-BGQ<br><br>Two assessment times (baseline, postintervention)                          | Decrease in ICG severity ( <i>p</i> < .001)<br><br>Mean change in pre-loss grief, as measured by both the BGQ and the ICG                                             | Psychoeducation, motivational interviewing, CBT techniques, prolonged-exposure techniques, memory work, mindfulness, self-care, and meaning-reconstruction activities; Additionally, participants invite a supportive other of their choosing to attend three of the sessions | Social workers            | 4                 |

*Note.* ACT = Acceptance and Commitment Therapy; CBT = Cognitive-Behavioral Therapy; CG = Control Group; CGS = The Caregiver Grief Scale; ICG-r = Inventory of Complicated Grief pre-loss version; IG = Intervention Group; MIT = Mentalizing Imagery Therapy; MM-CGI = *Marwit* and *Meuser* Caregiver Grief Inventory; MM-CGI-SF = *Marwit* and *Meuser* Caregiver Grief Inventory-Short Form; NDRGEI = Non-Death Revised Grief Experience Inventory; p-BGQ = pre-loss Brief Grief Questionnaire; PMR = Progressive Muscle Relaxation; RCT = Randomized Controlled Trial; WCG = Wait-list Control Group.
